# Supplementary material
Source: MDPI journal article supplement (https://www.mdpi.com/2673-4532/5/1/7)
Supplement: s1 [file s1 › analytica-2844976-supplementary.pdf]

Supplementary data

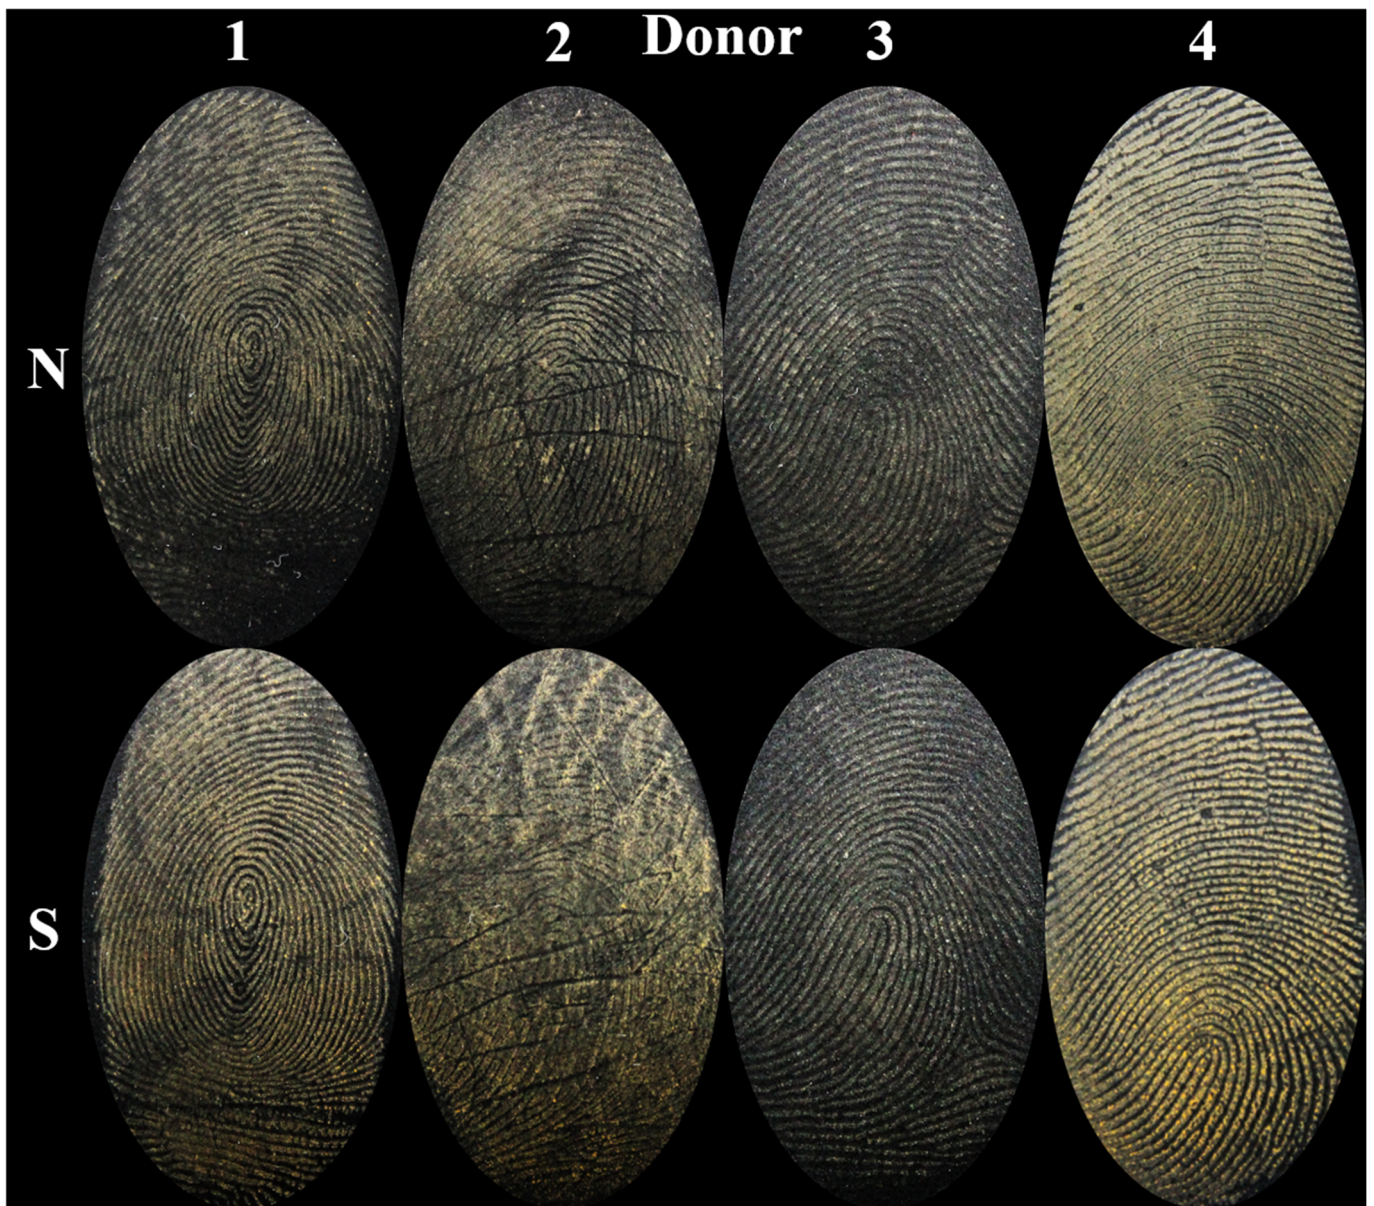

**Supplementary Figure S1.** Natural (N) and sebaceous (S) latent fingerprints deposited onto glass surfaces developed using bixin/kaolinite.

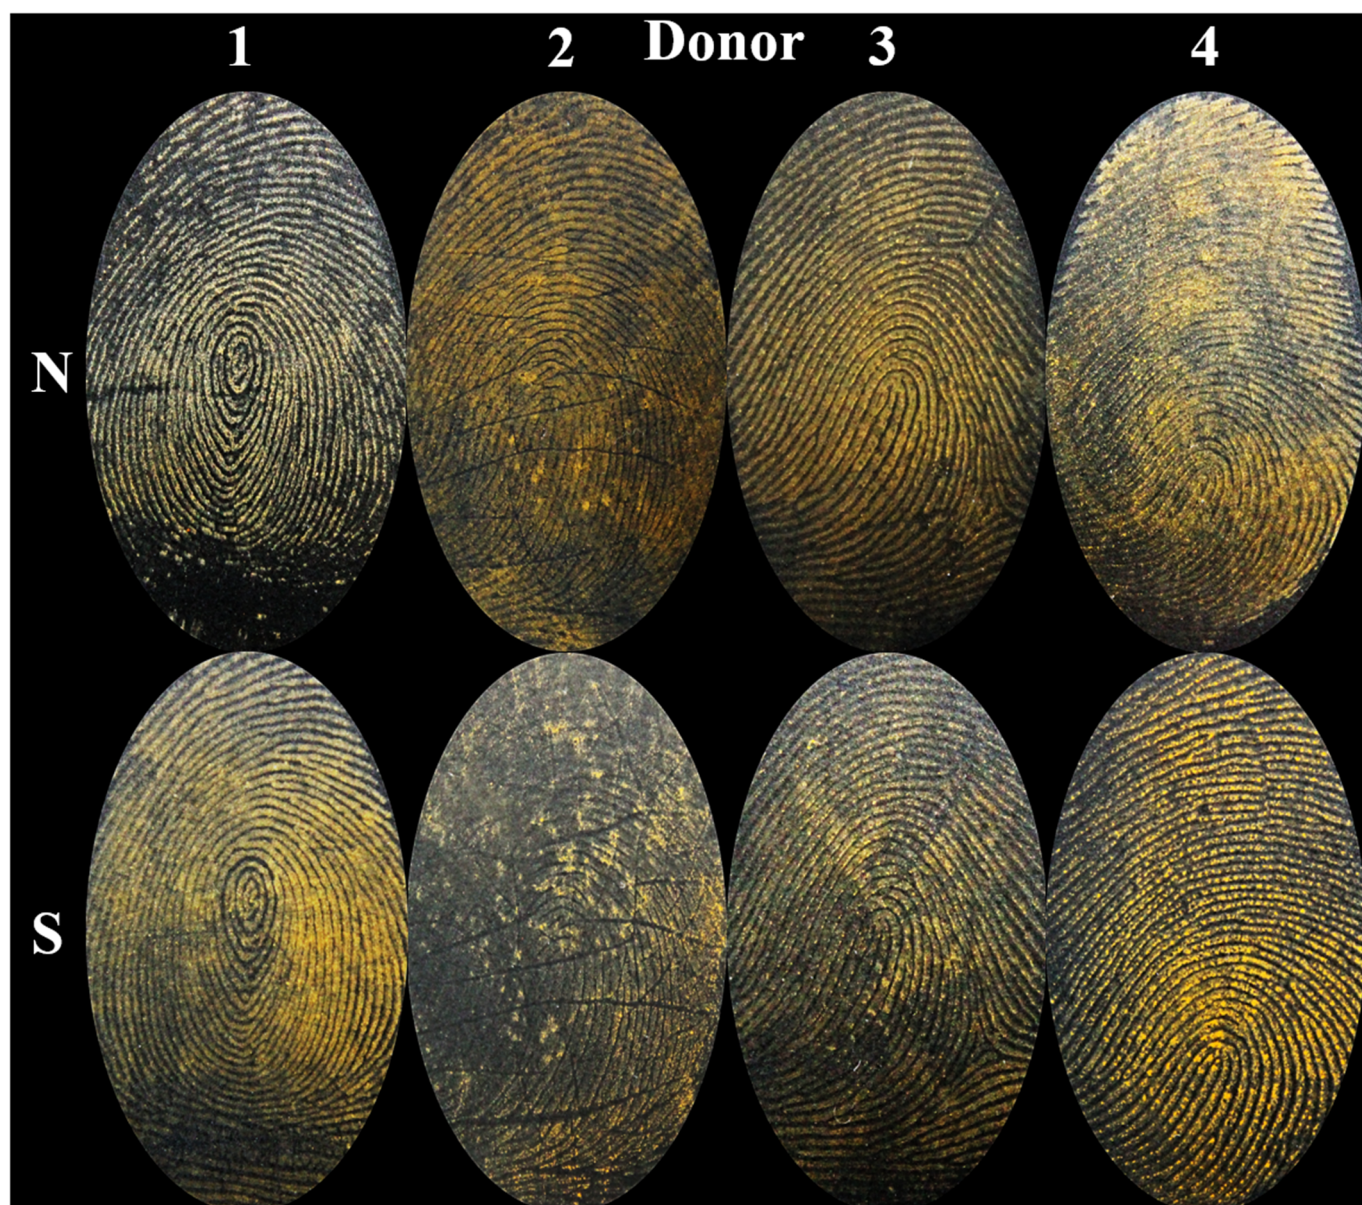

**Supplementary Figure S2.** Natural (N) and sebaceous (S) latent fingerprints deposited onto glass surfaces developed using bixin/ $\text{ZnCO}_3$ .

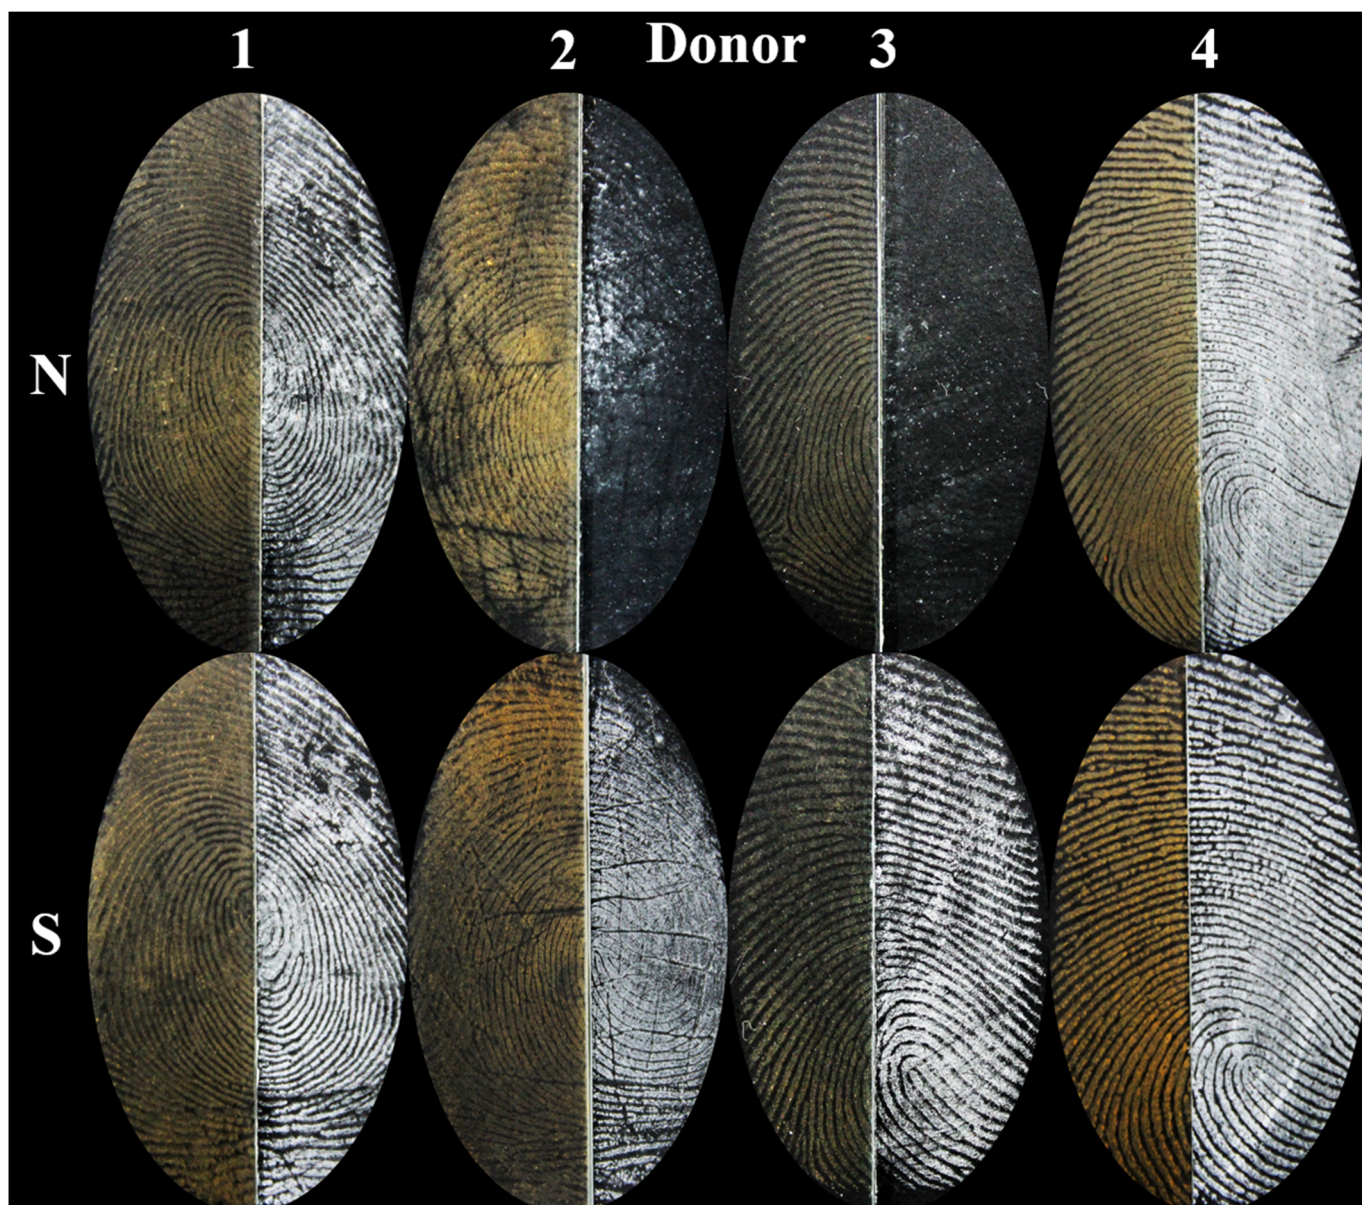

**Supplementary Figure S3.** Digital mark (Natural (N) and sebaceous (S)) sectioned and revealed left half with composite bixin/kaolinite and right half with White® commercial powder purchased from Sirchie.

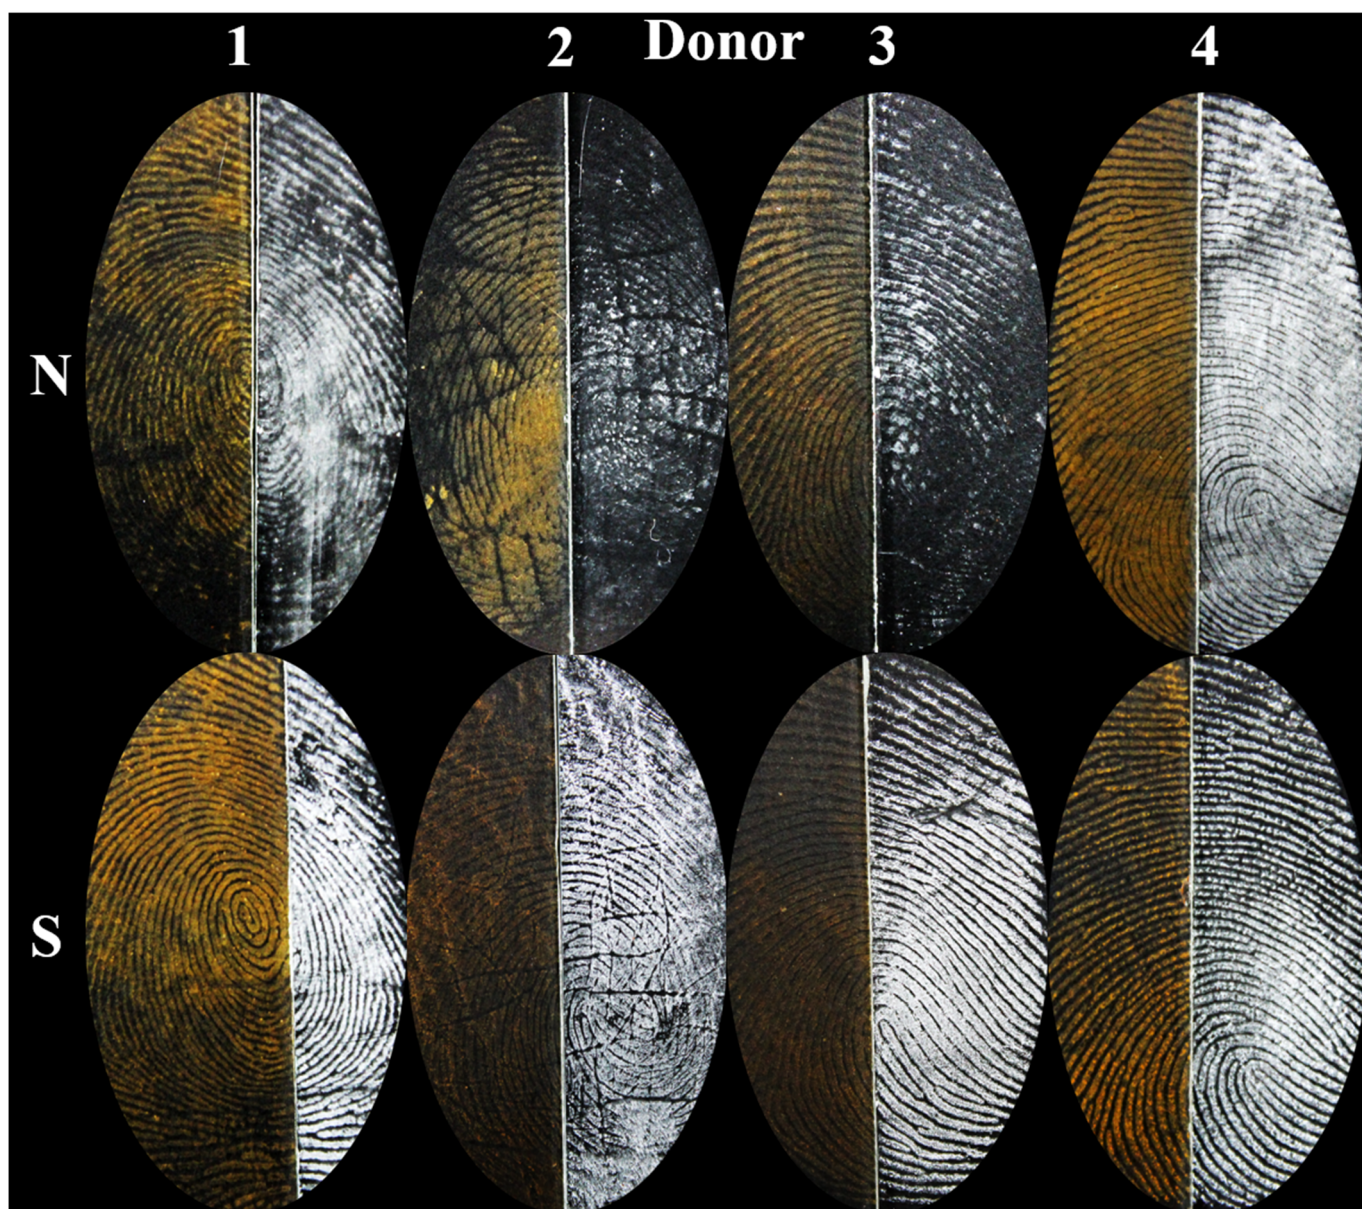

**Supplementary Figure S4.** Digital mark (Natural (N) and sebaceous (S)) sectioned and revealed left half with composite bixin/ $\text{ZnCO}_3$  and right half with White® commercial powder purchased from Sirchie.
